# Supplementary material
Source: publisher figshare collection journal article supplement (https://gsajournals.figshare.com/ndownloader/files/19295936)
Supplement: Supplementary file 1 [file 19295936]

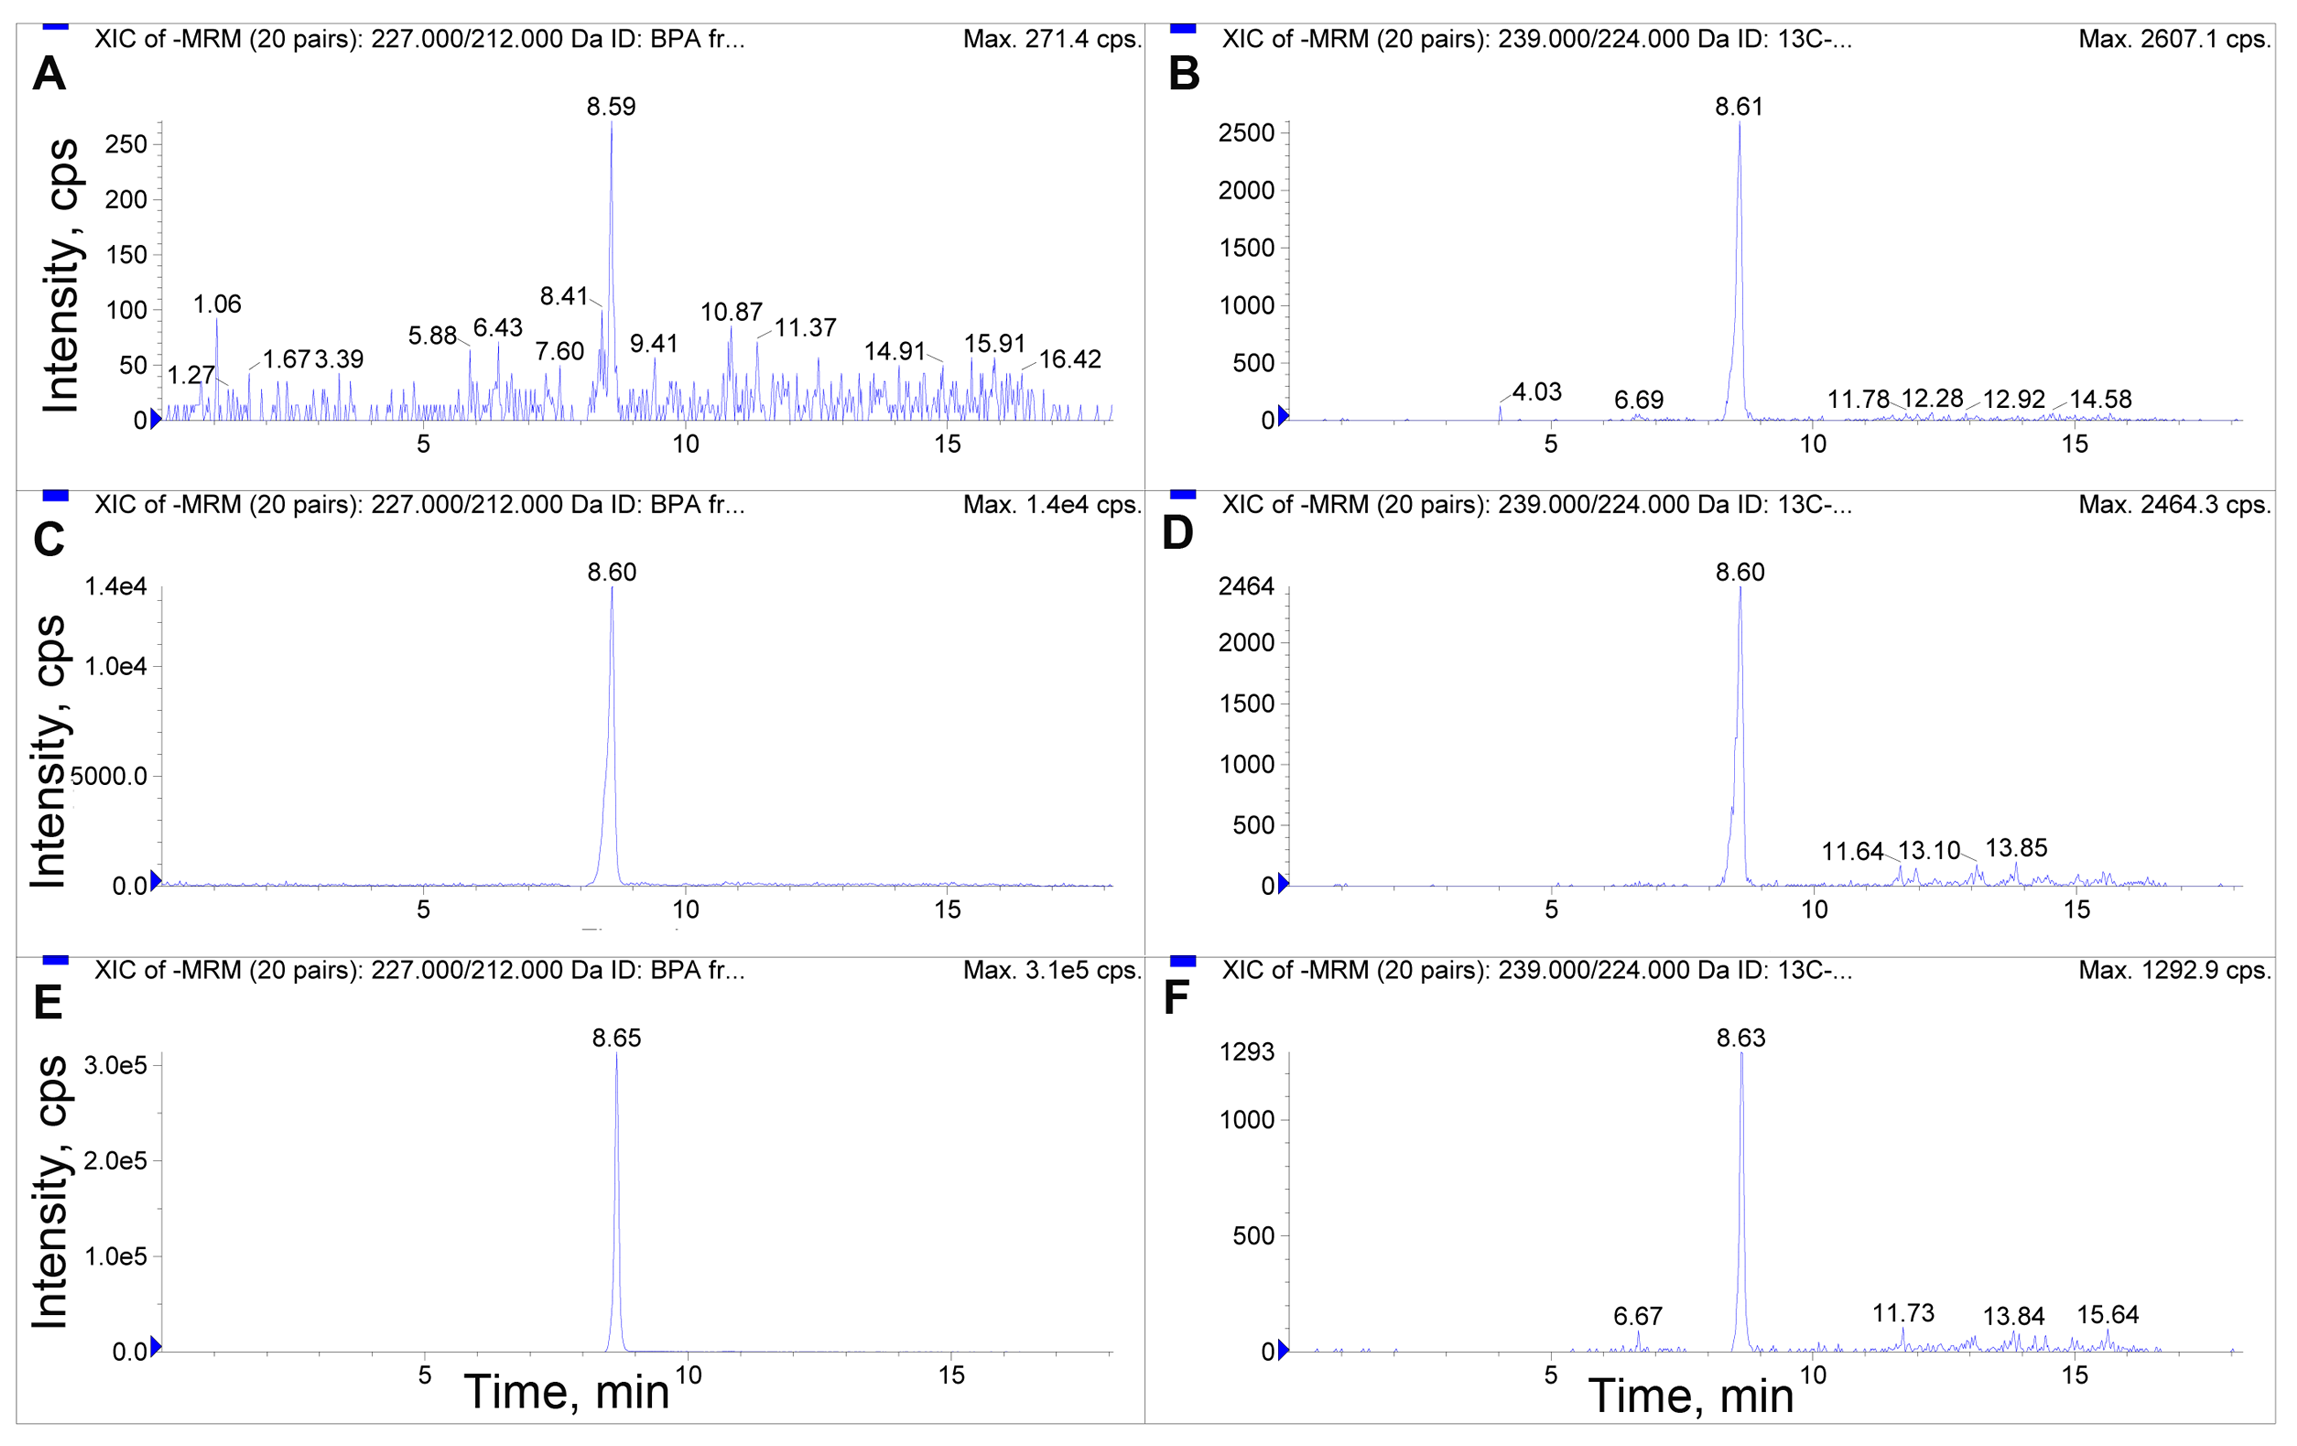


**Figure S1.** Representative LC-MS/MS chromatograms indicating significantly higher levels of BPA in worm lysates from BPA-exposed worms. Top left and right panels (A and B) are chromatograms showing unlabeled BPA and labeled BPA (13C12-BPA), respectively, in control sample (DMSO); middle left and right panels (C and D) are chromatograms for unlabeled BPA and labeled BPA (13C12-BPA), respectively, in control spike sample (matrix spike); and bottom left and right panels (E and F) are chromatograms for unlabeled BPA and labeled BPA (13C12-BPA), respectively, in worms exposed to BPA 500 µM. Y-axis represents relative abundance of signal intensity and X-axis retention time in minutes.
